# Supplementary material
Source: publisher figshare collection journal article supplement (https://tandf.figshare.com/articles/dataset/_/20470338)
Supplement: Supplementary file 1 [file 1]

## **Supplementary data**

### **Supplementary 1**

#### **Liquid chromatography with LC-MS/MS**

LC-MS/MS was carried out using an Orbitrap Fusion Lumos Tribrid mass spectrometer (Thermo Scientific, Massachusetts, USA). Peptides were isolated using an UltiMate 3000 nanoLC system (Thermo Scientific, Massachusetts, USA). Peptide mixtures were loaded onto a C18 Acclaim PepMap NanoLC column with a 75  $\mu$ m inner diameter and a 25-cm length, which was filled with 2  $\mu$ m particles with a pore size of 100 Å (Thermo Science, USA). The mobile phase A was made up of 0.1 % formic acid in water, while the mobile phase B was made up of 100% acetonitrile and 0.1 % formic acid. A segmented gradient elution from 2% to 40% of solvent B was applied in 90 minutes using a 300 nL/min flow rate. A full-MS scan (externally tuned to a mass precision of 5 ppm with a resolution of 120000 at  $m/z = 200$ , auto gain control [AGC] set to  $5e5$ , and a maximum injection time of 50 ms) was performed in a data-dependent mode, followed by 3 s of high-energy collisional dissociation (HCD)-MS/MS of the most intense ions. HCD-MS/MS (with a resolution of 15000) was utilized to fragment multicharged ions. An AGC of  $5e4$  was used for MS/MS analysis, with previously selected ions dynamically deleted for 180 seconds. The injection time was set to 50 milliseconds.

#### **Exploration of proteomics database**

Raw MS/MS data from the Proteome Discoverer kit was searched against the UniProt Knowledgebase human protein database (Swiss-prot) using the Mascot search method (version 2.2, Thermo Scientific). The following parameters were used in the search: MS/MS ion mass

tolerance of 0.02 Da, with up to two missed cleavages allowed; peptide mass tolerance was 10 ppm, and variable modifications such as deamidation, oxidation, phospho, carbamidomethyl, methyl, and acetyl were allowed. Based on a 1% false discovery rate (FDR). The protein content was determined by measuring the concentration of ions obtained from MS spectra of associated peptides. DAVID Bioinformatics Resources 6.8 was used to perform functional annotation clustering with gene ontology (GO) enrichment analysis allowing to examine the biological process involved and the enrichment of functional annotation clustering.

**Supplementary Table 1:** List of growth factors, cytokines and antioxidants found in PEVs by LC-MS/MS

| Accession     | Description                                                                                                        |
|---------------|--------------------------------------------------------------------------------------------------------------------|
| <b>P42566</b> | Epidermal growth factor receptor substrate 15 OS=Homo sapiens OX=9606 GN=EPS15 PE=1 SV=2                           |
| <b>Q15582</b> | Transforming growth factor-beta-induced protein ig-h3 OS=Homo sapiens OX=9606 GN=TGFB1 PE=1 SV=1                   |
| <b>P17936</b> | Insulin-like growth factor-binding protein 3 OS=Homo sapiens OX=9606 GN=IGFBP3 PE=1 SV=2                           |
| <b>Q9UBC2</b> | Epidermal growth factor receptor substrate 15-like 1 OS=Homo sapiens OX=9606 GN=EPS15L1 PE=1 SV=1                  |
| <b>Q04756</b> | Hepatocyte growth factor activator OS=Homo sapiens OX=9606 GN=HGFA1 PE=1 SV=1                                      |
| <b>P01344</b> | Insulin-like growth factor II OS=Homo sapiens OX=9606 GN=IGF2 PE=1 SV=1                                            |
| <b>O43294</b> | Transforming growth factor beta-1-induced transcript 1 protein OS=Homo sapiens OX=9606 GN=TGFB1I1 PE=1 SV=2        |
| <b>P62993</b> | Growth factor receptor-bound protein 2 OS=Homo sapiens OX=9606 GN=GRB2 PE=1 SV=1                                   |
| <b>P01137</b> | Transforming growth factor beta-1 proprotein OS=Homo sapiens OX=9606 GN=TGFB1 PE=1 SV=2                            |
| <b>P35858</b> | Insulin-like growth factor-binding protein complex acid labile subunit OS=Homo sapiens OX=9606 GN=IGFALS PE=1 SV=1 |
| <b>Q14766</b> | Latent-transforming growth factor beta-binding protein 1 OS=Homo sapiens OX=9606 GN=LTBP1 PE=1 SV=4                |
| <b>Q9Y2Q3</b> | Glutathione S-transferase kappa 1 OS=Homo sapiens OX=9606 GN=GSTK1 PE=1 SV=3                                       |
| <b>Q9UJC5</b> | SH3 domain-binding glutamic acid-rich-like protein 2 OS=Homo sapiens OX=9606 GN=SH3BGRL2 PE=1 SV=2                 |
| <b>Q9H299</b> | SH3 domain-binding glutamic acid-rich-like protein 3 OS=Homo sapiens OX=9606 GN=SH3BGRL3 PE=1 SV=1                 |
| <b>Q16775</b> | Hydroxyacylglutathione hydrolase, mitochondrial OS=Homo sapiens OX=9606 GN=HAGH PE=1 SV=2                          |
| <b>Q13162</b> | Peroxiredoxin-4 OS=Homo sapiens OX=9606 GN=PRDX4 PE=1 SV=1                                                         |
| <b>Q06830</b> | Peroxiredoxin-1 OS=Homo sapiens OX=9606 GN=PRDX1 PE=1 SV=1                                                         |
| <b>Q04760</b> | Lactoylglutathione lyase OS=Homo sapiens OX=9606 GN=GLO1 PE=1 SV=4                                                 |
| <b>P78417</b> | Glutathione S-transferase omega-1 OS=Homo sapiens OX=9606 GN=GSTO1 PE=1 SV=2                                       |
| <b>P48637</b> | Glutathione synthetase OS=Homo sapiens OX=9606 GN=GSS PE=1 SV=1                                                    |
| <b>P48507</b> | Glutamate--cysteine ligase regulatory subunit OS=Homo sapiens OX=9606 GN=GCLM PE=1 SV=1                            |
| <b>P36969</b> | Phospholipid hydroperoxide glutathione peroxidase OS=Homo sapiens OX=9606 GN=GPX4 PE=1 SV=3                        |
| <b>P32119</b> | Peroxiredoxin-2 OS=Homo sapiens OX=9606 GN=PRDX2 PE=1 SV=5                                                         |
| <b>P30048</b> | Thioredoxin-dependent peroxide reductase, mitochondrial OS=Homo sapiens OX=9606 GN=PRDX3 PE=1 SV=3                 |

|               |                                                                                                 |
|---------------|-------------------------------------------------------------------------------------------------|
| <b>P30044</b> | Peroxiredoxin-5, mitochondrial OS=Homo sapiens OX=9606 GN=PRDX5 PE=1 SV=4                       |
| <b>P30041</b> | Peroxiredoxin-6 OS=Homo sapiens OX=9606 GN=PRDX6 PE=1 SV=3                                      |
| <b>P22352</b> | Glutathione peroxidase 3 OS=Homo sapiens OX=9606 GN=GPX3 PE=1 SV=2                              |
| <b>P21266</b> | Glutathione S-transferase Mu 3 OS=Homo sapiens OX=9606 GN=GSTM3 PE=1 SV=3                       |
| <b>P10768</b> | S-formylglutathione hydrolase OS=Homo sapiens OX=9606 GN=ESD PE=1 SV=2                          |
| <b>P09488</b> | Glutathione S-transferase Mu 1 OS=Homo sapiens OX=9606 GN=GSTM1 PE=1 SV=3                       |
| <b>P09211</b> | Glutathione S-transferase P OS=Homo sapiens OX=9606 GN=GSTP1 PE=1 SV=2                          |
| <b>P07203</b> | Glutathione peroxidase 1 OS=Homo sapiens OX=9606 GN=GPX1 PE=1 SV=4                              |
| <b>P04179</b> | Superoxide dismutase [Mn], mitochondrial OS=Homo sapiens OX=9606 GN=SOD2 PE=1 SV=3              |
| <b>P04040</b> | Catalase OS=Homo sapiens OX=9606 GN=CAT PE=1 SV=3                                               |
| <b>P00441</b> | Superoxide dismutase [Cu-Zn] OS=Homo sapiens OX=9606 GN=SOD1 PE=1 SV=2                          |
| <b>P00390</b> | Glutathione reductase, mitochondrial OS=Homo sapiens OX=9606 GN=GSR PE=1 SV=2                   |
| <b>O76003</b> | Glutaredoxin-3 OS=Homo sapiens OX=9606 GN=GLRX3 PE=1 SV=2                                       |
| <b>O75368</b> | SH3 domain-binding glutamic acid-rich-like protein OS=Homo sapiens OX=9606 GN=SH3BGRL PE=1 SV=1 |

**Supplementary Table 2:** Biochemical analysis of platelet extracellular vesicles (PEVs)

| <b>Content</b>              | <b>Mean</b> | <b>SD</b> |
|-----------------------------|-------------|-----------|
| <b>Glucose (mg/dL)</b>      | 87.67       | 12.50     |
| <b>Albumin (mg/dL)</b>      | 27.70       | 0.12      |
| <b>Cholesterol (mg/dL)</b>  | 17.33       | 0.58      |
| <b>Triglyceride (mg/dL)</b> | 15.00       | 6.08      |
| <b>Cl (mEq/L)</b>           | 116.33      | 0.58      |
| <b>Na (mEq/L)</b>           | 142.33      | 2.52      |
| <b>K (mEq/L)</b>            | 3.23        | 0.06      |
| <b>Ca (mg/dL)</b>           | <1.2        |           |
| <b>P (mg/dL)</b>            | 1.43        | 0.21      |
| <b>Mg (mEq/L)</b>           | 1.10        | 0.00      |
| <b>Fe (μ/dL)</b>            | 76.70       | 3.79      |
| <b>TIBC (μg/dL)</b>         | 266.70      | 5.03      |
| <b>UIB (μg/dL)</b>          | 190.00      | 1.73      |
| <b>Ferritin (ng/mL)</b>     | 45.33       | 15.14     |
| <b>Vitamin B12 (pg/mL)</b>  | 87.07       | 39.32     |
| <b>Folate (ng/mL)</b>       | 2.70        | 1.33      |
| <b>Fibrinogen (mg/mL)</b>   | <0.4        |           |
| <b>Hemoglobin (g/dl)</b>    | 0.13        | 0.12      |
